# Supplementary material for: Connecting regional aerosol emissions reductions to local and remote precipitation responses
Source: Copernicus journal article supplement (doi:10.5194/acp-18-12461-2018), 2018-08-28
Supplement: Supplementary file 1 [file acp-18-12461-2018-supplement.pdf]

Supplement of Atmos. Chem. Phys., 18, 12461–12475, 2018  
<https://doi.org/10.5194/acp-18-12461-2018-supplement>  
© Author(s) 2018. This work is distributed under  
the Creative Commons Attribution 4.0 License.

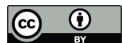

*Supplement of*

## **Connecting regional aerosol emissions reductions to local and remote precipitation responses**

**Daniel M. Westervelt et al.**

*Correspondence to:* Daniel M. Westervelt ([danielmw@ldeo.columbia.edu](mailto:danielmw@ldeo.columbia.edu))

The copyright of individual parts of the supplement might differ from the CC BY 4.0 License.

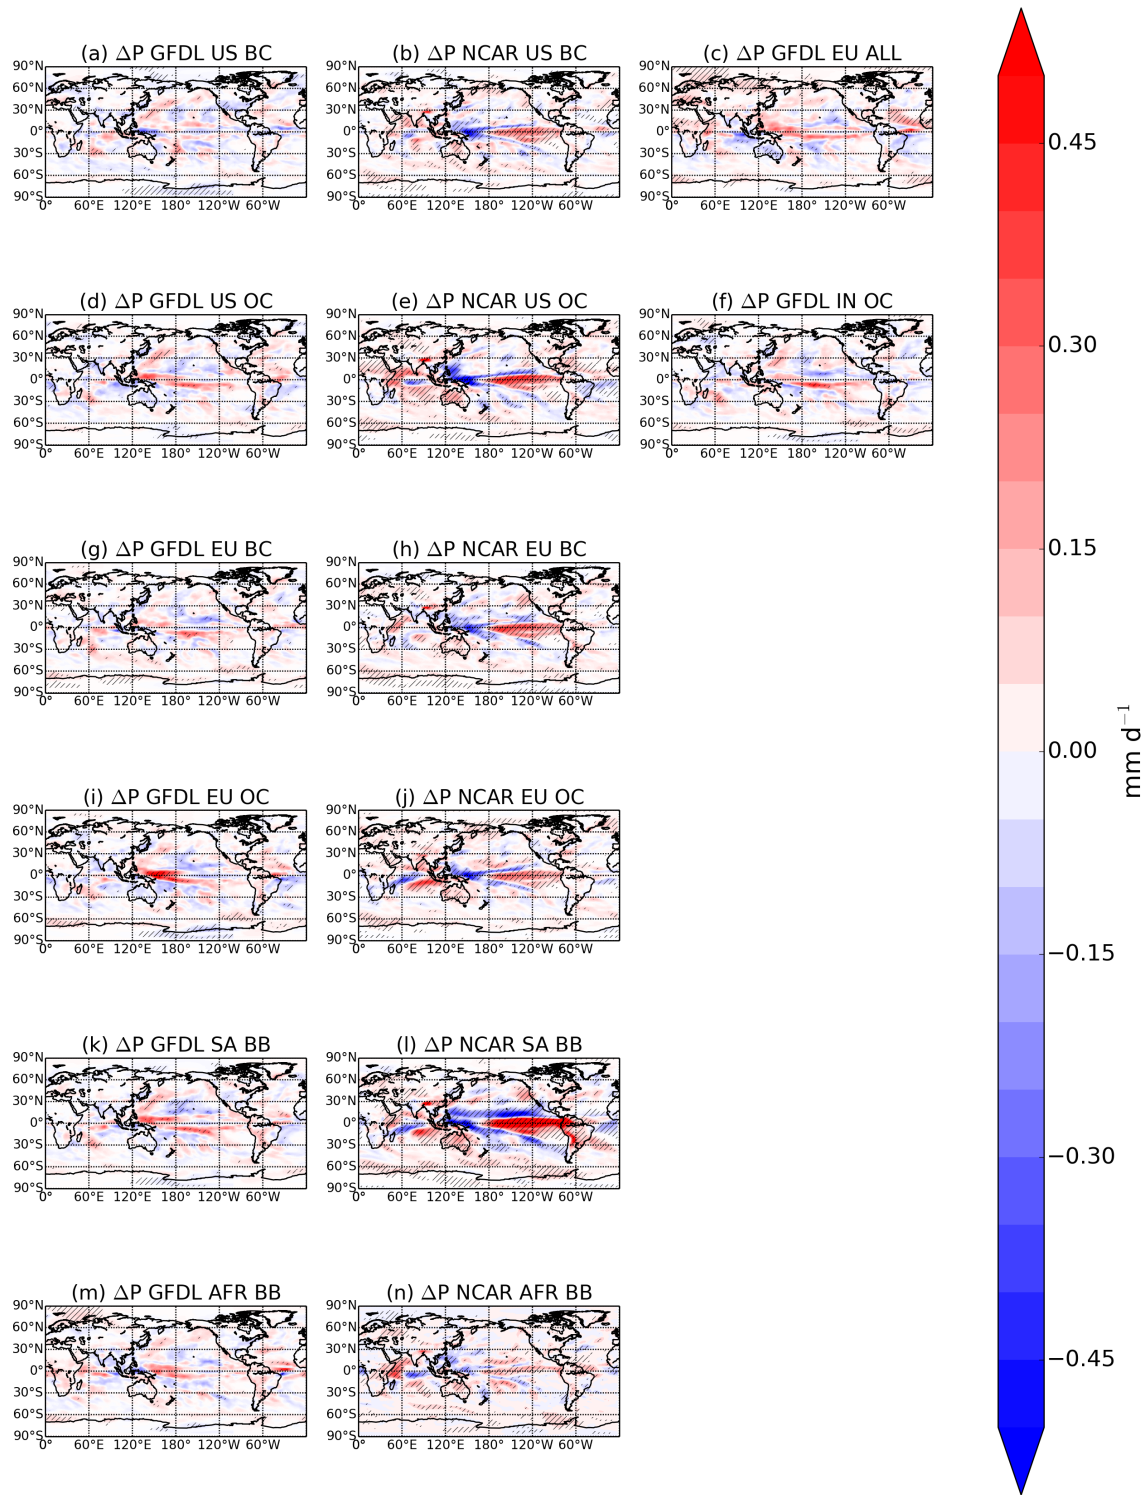

**Figure S1: 200-year annual mean precipitation response to aerosol emissions decreases in each of the three models (GFDL-CM3, first column; NCAR-CESM1, second column; GISS-E2, third column) for several different regional emissions decreases (see Table 1)**

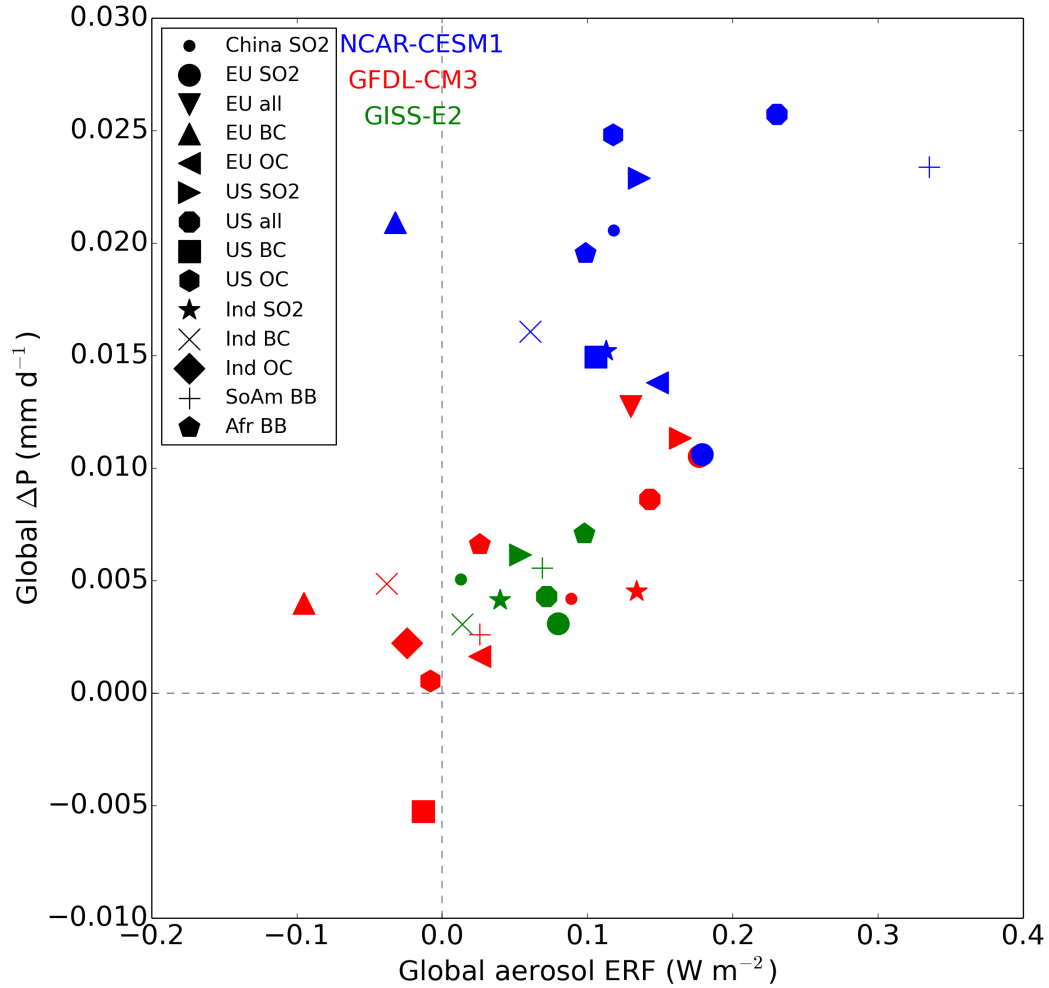

**Figure S2: Scatterplot of global aerosol effective radiative forcing and precipitation response for GFDL-CM3 (red), NCAR-CESM1 (blue), and GISS-E2 (green)**

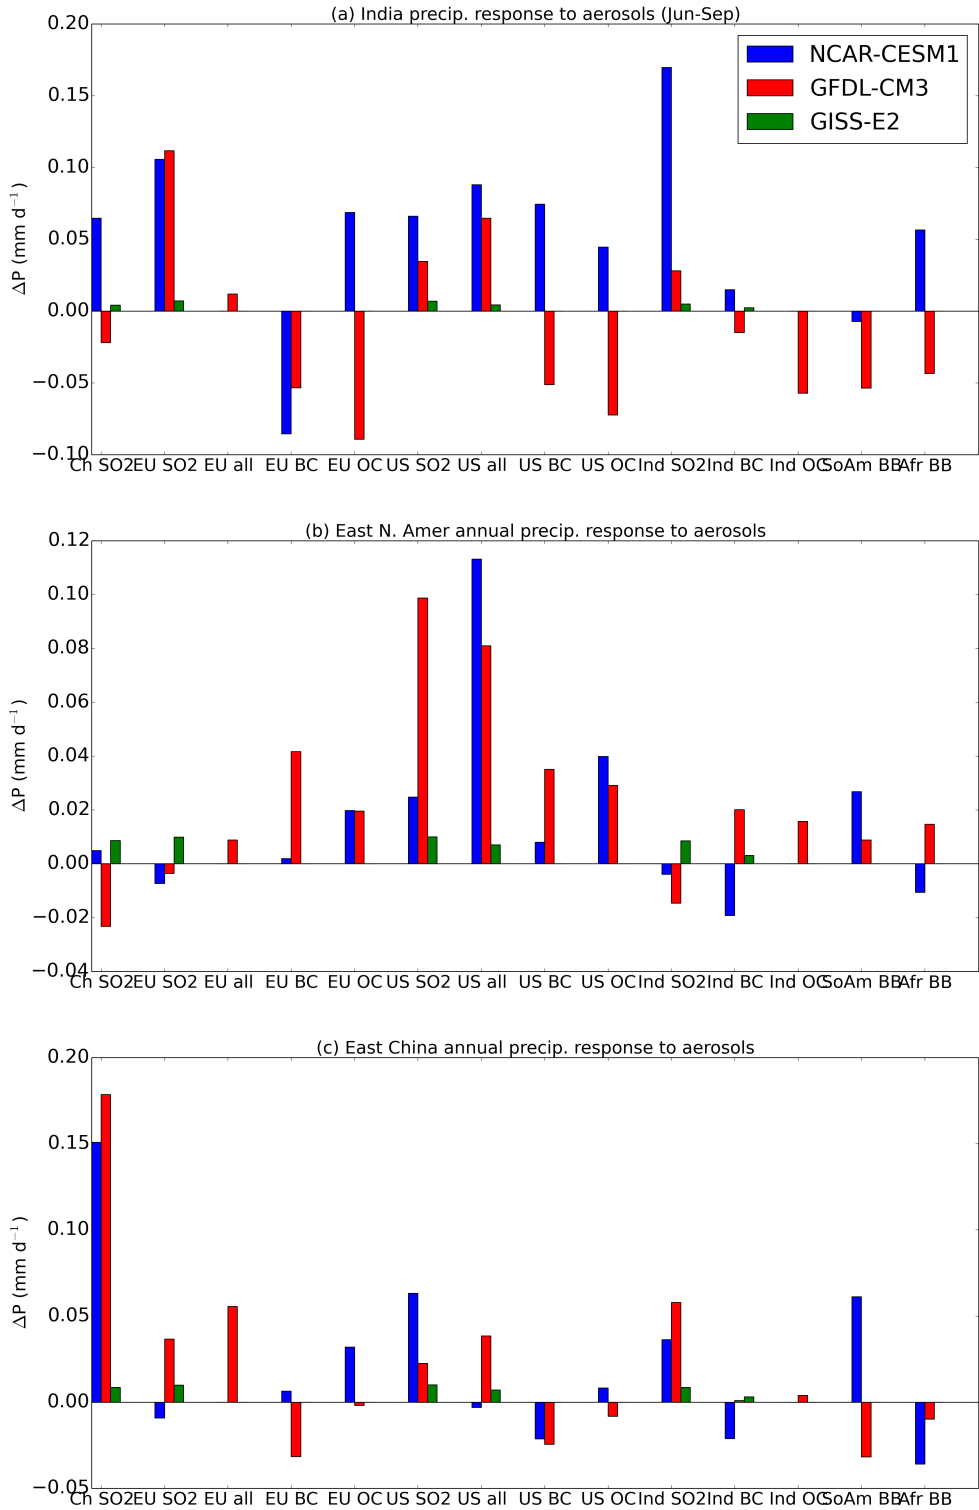

**Figure S3: Regional and global precipitation response to each individual aerosol emissions decrease (Table 1). (a) India, Jun-Sep, (b) Eastern North America, annual, (c) Eastern China, annual**

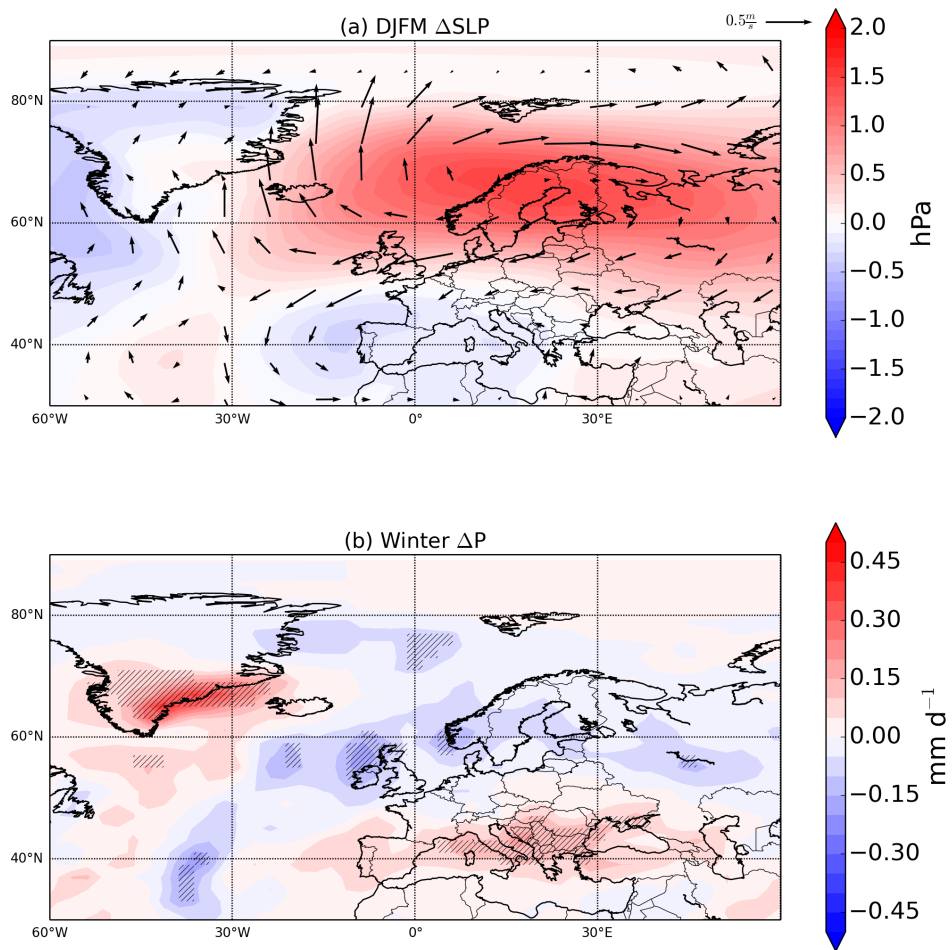

**Figure S4: Wintertime response in sea-level pressure and surface winds (a) and precipitation (b) to reduction of European BC emissions in GFDL-CM3**

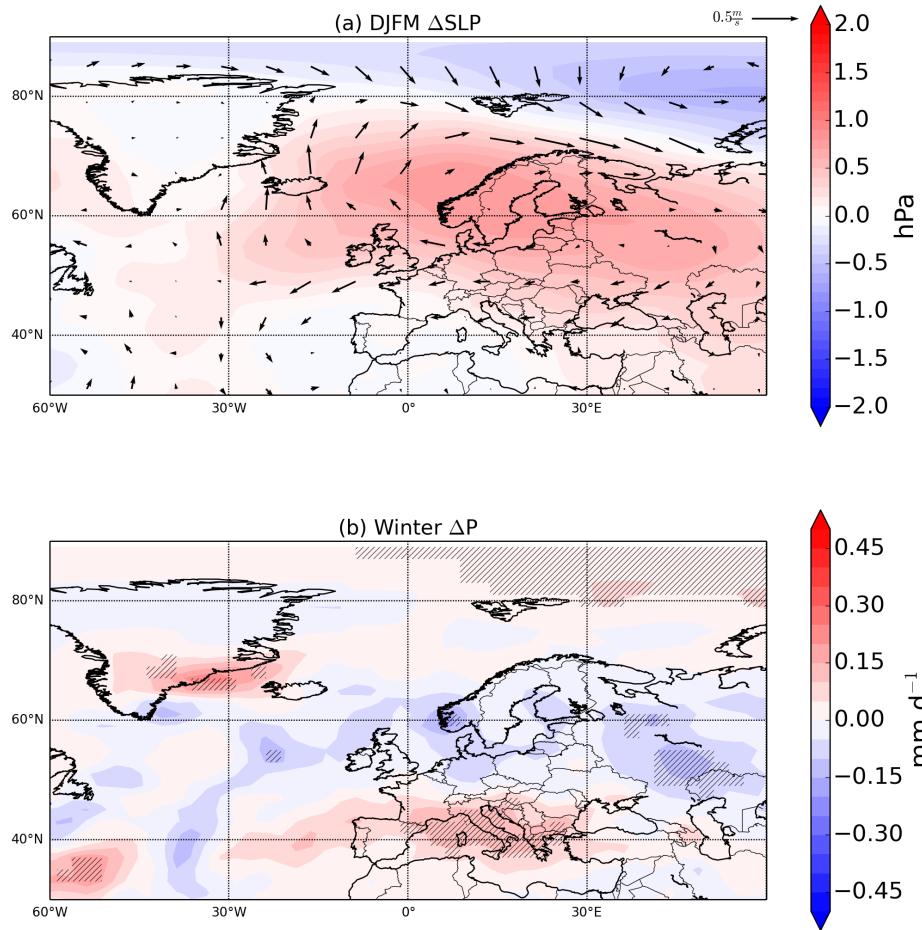

**Figure S5: Same as S4, but for European OA emissions**

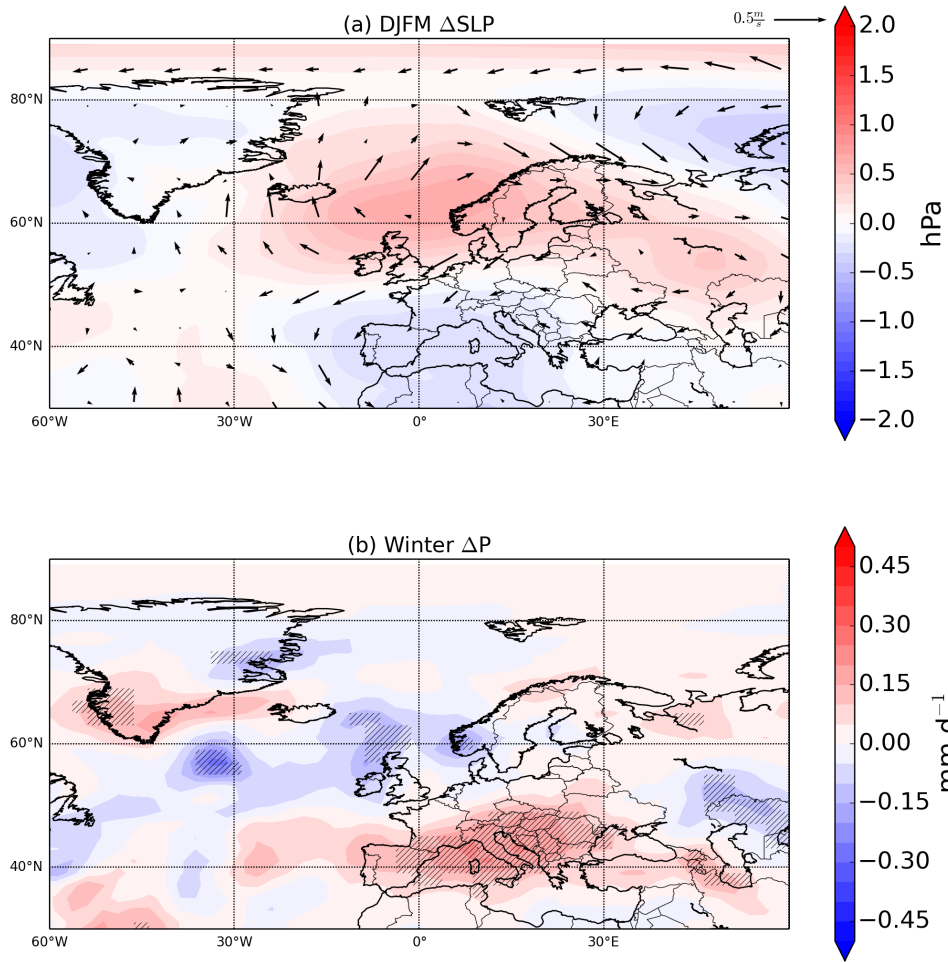

Figure S6: Same as S5, but for an emissions sum of BC, OA, and SO<sub>2</sub>

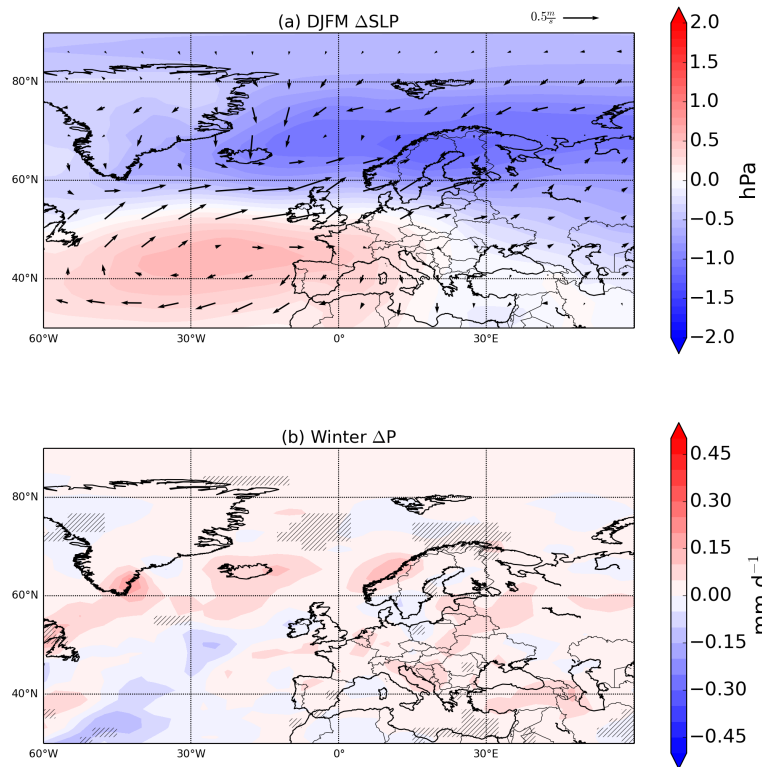

**Figure S7: Wintertime response in sea-level pressure and surface winds (a) and precipitation (b) to reduction of European SO<sub>2</sub> emissions in NCAR-CESM1**



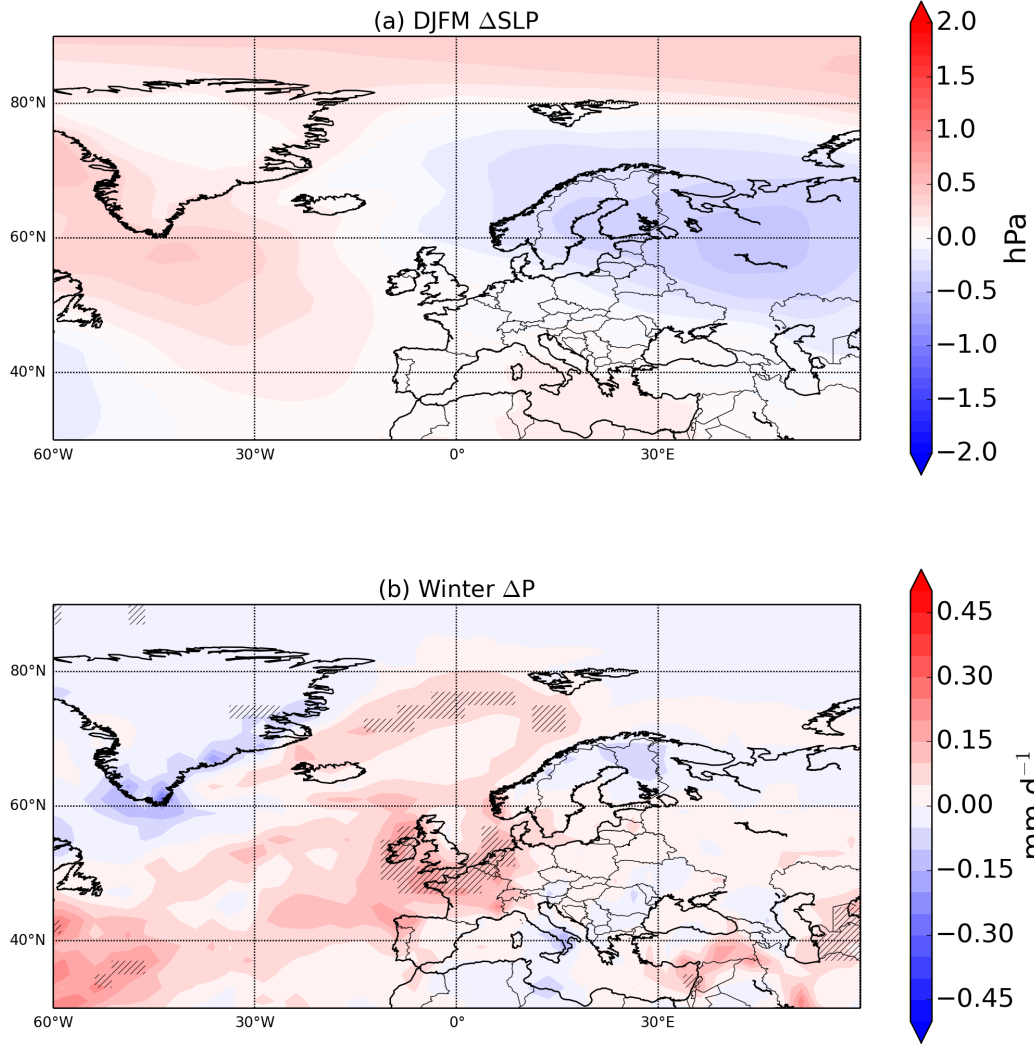

**Figure S8: Wintertime response in sea-level pressure (a) and precipitation (b) to reduction of European SO<sub>2</sub> emissions in GISS-E2**
